# Supplementary material
Source: Springer Nature journal article supplement (https://www.springermedizin.de/resource/supplementary/12913_2009_1432_MOESM2_ESM.pdf/9528114)
Supplement: MOESM2 [file 9528114]

Titles and abstracts retrieved (RCTs and CCTs from 1997 to 2008) = 1218

Limit = 1-60  
months of age

137 titles and abstracts  
retrieved.

Limit = LMIC

22 titles found potentially  
eligible, full text retrieved  
and reviewed.

10 studies included in  
the review.

12 studies excluded:

- Not an RCT; randomization not clear.
- CHW not the only intervention.
- CHW intervention not meeting inclusion criteria.
- Intervention outcomes could not be isolated for children.
